# Supplementary material for: Determination of the stereochemistry of anhydroerythromycin A, the principal degradation product of the antibiotic erythromycin A
Source: Royal Society of Chemistry journal article supplement (doi:10.1039/b518182h), 2006-01-01
Supplement: b518182h.pdf [file b518182h.pdf]

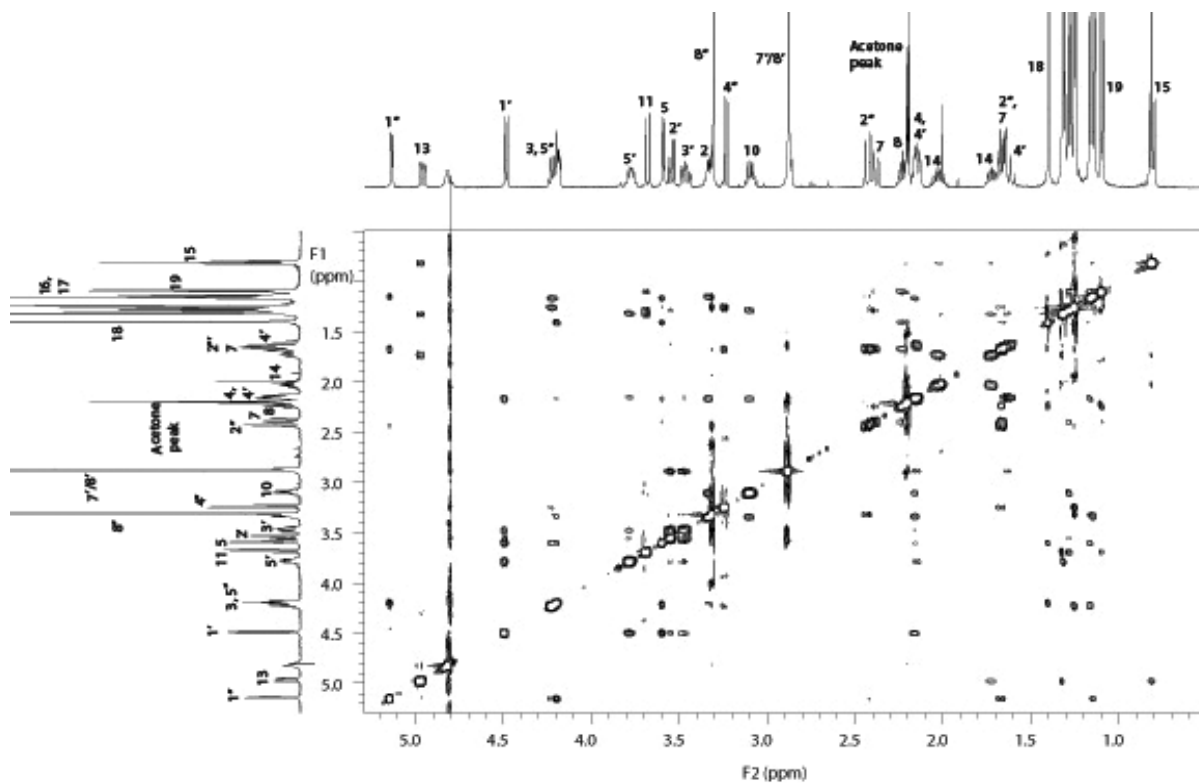

**Figure 1.** A contour plot of the 500 MHz ROESY spectrum of anhydroerythromycin A (1) in deuteriated phosphate buffer at apparent pH 7.0, 25 °C.

**Table 1.** 500 MHz ROESY connectivity table of anhydroerythromycin A (**1**) in deuteriated phosphate buffer at apparent pH 7.0, 25 °C; mixing time is 500 ms

|       | 2 | 3 | 4 | 5 | 7r | 7s | 8 | 10 | 11 | 13 | 14s | 14r | 15 | 16 | 17 | 18 | 19 | 20 | 21 | 1' | 2' | 3' | 4'r | 4's | 5' | 6' | 7',8' | 1'' | 2''r | 2''s | 4'' | 5'' | 6'' | 7'' | 8'' |   |  |
|-------|---|---|---|---|----|----|---|----|----|----|-----|-----|----|----|----|----|----|----|----|----|----|----|-----|-----|----|----|-------|-----|------|------|-----|-----|-----|-----|-----|---|--|
| 2     | • | S | M |   |    |    |   | M  |    |    |     |     |    | M  |    |    |    |    |    |    |    |    |     |     |    |    |       |     |      |      |     |     |     |     |     |   |  |
| 3     | S | • | V | S |    |    |   |    |    |    |     |     |    |    | M  |    |    |    |    |    |    |    |     |     |    |    | M     |     |      |      |     |     |     |     |     |   |  |
| 4     | M | V | • | V |    |    |   | S  |    |    |     |     |    |    | S  |    |    |    |    | M  |    |    |     |     |    |    |       |     |      |      |     |     |     |     |     |   |  |
| 5     |   | S | V | • |    |    |   |    |    |    |     |     |    |    | M  | M  |    |    |    | M  |    |    |     |     |    |    |       |     |      |      |     |     |     | M   |     |   |  |
| 7r    |   |   |   |   | •  | L  | S |    |    |    |     |     |    |    |    | S  |    |    |    |    |    |    |     |     |    |    |       |     |      |      |     |     |     |     |     |   |  |
| 7s    |   |   |   |   |    | L  | • | S  |    |    |     |     |    |    |    |    | S  | S  |    |    |    |    |     |     |    |    |       |     |      |      |     |     |     |     |     |   |  |
| 8     |   |   |   |   |    | S  | S | •  |    |    |     |     |    |    |    | S  | M  |    |    |    |    |    |     |     |    |    |       |     |      |      |     |     |     |     |     |   |  |
| 10    | M |   | S |   |    |    |   |    | •  |    |     |     |    |    |    |    |    |    | M  |    |    |    |     |     |    |    |       |     |      |      |     |     |     |     |     |   |  |
| 11    |   |   |   |   |    |    |   |    |    | •  |     |     |    |    |    |    |    | S  | M  | M  |    |    |     |     |    |    |       |     |      |      |     |     |     |     |     |   |  |
| 13    |   |   |   |   |    |    |   |    |    |    | •   |     | M  | M  |    |    |    |    |    |    |    |    |     |     |    |    |       |     |      |      |     |     |     |     |     |   |  |
| 14s   |   |   |   |   |    |    |   |    |    |    |     | •   | L  | V  |    |    |    |    |    |    |    |    |     |     |    |    |       |     |      |      |     |     |     |     |     |   |  |
| 14r   |   |   |   |   |    |    |   |    |    |    |     | M   | L  | •  | V  |    |    |    | S  |    |    |    |     |     |    |    |       |     |      |      |     |     |     |     |     |   |  |
| 15    |   |   |   |   |    |    |   |    |    |    |     | M   | V  | V  | •  |    |    |    |    |    |    |    |     |     |    |    |       |     |      |      |     |     |     |     |     |   |  |
| 16    | M |   |   |   |    |    |   |    |    |    |     |     |    |    | •  |    |    |    |    |    |    |    |     |     |    |    |       | M   |      |      |     |     |     |     |     |   |  |
| 17    |   |   | S | M |    |    |   |    |    |    |     |     |    |    |    | •  |    |    |    |    |    |    |     |     |    |    |       |     |      |      |     |     | M   |     |     | S |  |
| 18    |   | M |   | M | S  |    | S |    |    |    |     |     |    |    |    |    | •  |    |    |    |    |    |     |     |    |    |       |     |      |      |     |     |     |     |     |   |  |
| 19    |   |   |   |   |    | S  | M |    | S  |    |     |     |    |    |    |    |    | •  | S  |    |    |    |     |     |    |    |       |     |      |      |     |     |     |     |     |   |  |
| 20    |   |   |   |   |    | S  |   | M  | M  |    |     |     |    |    |    |    |    | S  | •  |    | V  |    |     |     |    |    |       |     |      |      |     |     |     |     |     |   |  |
| 21    |   |   |   |   |    |    |   |    | M  | M  |     | S   |    |    |    |    |    |    |    |    | •  |    |     |     |    |    |       |     |      |      |     |     |     |     |     |   |  |
| 1'    |   |   | M | M |    |    |   |    |    |    |     |     |    |    |    |    |    |    |    | •  | S  | M  |     |     | L  |    |       |     |      |      |     |     |     |     |     |   |  |
| 2'    |   |   |   |   |    |    |   |    |    |    |     |     |    |    |    |    |    | V  |    | S  | •  |    |     | V   |    | M  |       |     |      |      |     |     |     |     |     |   |  |
| 3'    |   |   |   |   |    |    |   |    |    |    |     |     |    |    |    |    |    |    | M  |    | •  |    | V   | S   |    | M  |       |     |      |      |     |     |     |     |     |   |  |
| 4'r   |   |   |   |   |    |    |   |    |    |    |     |     |    |    |    |    |    |    |    |    |    |    | •   | L   |    | S  | S     |     |      |      |     |     |     |     |     |   |  |
| 4's   |   |   |   |   |    |    |   |    |    |    |     |     |    |    |    |    |    |    |    |    |    |    | V   | L   | •  | S  |       | S   |      |      |     |     |     |     |     |   |  |
| 5'    |   |   |   |   |    |    |   |    |    |    |     |     |    |    |    |    |    |    |    | L  | V  | S  |     | S   | •  | M  |       |     |      |      |     |     |     |     |     |   |  |
| 6'    |   |   |   |   |    |    |   |    |    |    |     |     |    |    |    |    |    |    |    |    |    |    | S   |     | M  | •  |       |     |      |      |     |     |     |     |     |   |  |
| 7',8' |   |   |   |   |    |    |   |    |    |    |     |     |    |    |    |    |    |    |    |    |    |    | M   | M   | S  | S  |       | •   |      |      |     |     |     |     |     |   |  |
| 1''   |   | M |   |   |    |    |   |    |    |    |     |     |    | M  |    |    |    |    |    |    |    |    |     |     |    |    | •     | M   | V    |      | V   |     |     |     |     |   |  |
| 2''r  |   |   |   |   |    |    |   |    |    |    |     |     |    |    |    |    |    |    |    |    |    |    |     |     |    |    | M     | •   | L    | M    |     |     |     |     |     |   |  |
| 2''s  |   |   |   |   |    |    |   |    |    |    |     |     |    |    |    |    |    |    |    |    |    |    |     |     |    |    | V     | L   | •    |      |     |     |     |     | M   |   |  |
| 4''   |   |   |   |   |    |    |   |    |    |    |     |     |    |    |    |    |    |    |    |    |    |    |     |     |    |    | M     |     | •    | S    |     | L   |     |     |     |   |  |
| 5''   |   |   | M |   |    |    |   |    |    |    |     |     |    |    | M  |    |    |    |    |    |    |    |     |     |    |    | V     |     | S    | •    | L   |     |     |     |     |   |  |
| 6''   |   |   |   |   |    |    |   |    |    |    |     |     |    |    |    |    |    |    |    |    |    |    |     |     |    |    |       |     |      |      | L   | •   |     |     |     |   |  |
| 7''   |   |   |   |   |    |    |   |    |    |    |     |     |    |    |    |    |    |    |    |    |    |    |     |     |    |    |       |     |      | L    |     |     | •   | M   |     |   |  |
| 8''   |   |   |   |   |    |    |   |    |    |    |     |     |    |    | S  |    |    |    |    |    |    |    |     |     |    |    |       |     | M    |      |     |     | M   | •   |     |   |  |

Very small signal: V; Small signal : S; Medium Signal: M; Large signal: L

#### Chemical shifts of methylene protons

H-7r:  $\delta$  1.65; H-7s:  $\delta$  2.4; H-14s:  $\delta$  2.0; H-14r:  $\delta$  1.7; H-4'r:  $\delta$  1.62; H-4's:  $\delta$  2.18; H-2''r:  $\delta$  1.7; H-2''s:  $\delta$  2.43. The symbols r and s are used as abbreviations for *proR* and *pros* in this table.

### Full NMR assignments of anhydroerythromycin A 2'-acetate (4) in CDCl<sub>3</sub>

Anhydroerythromycin A 2'-acetate (4) was dissolved in CDCl<sub>3</sub> to a concentration of 30 mg ml<sup>-1</sup>. In the 1D-<sup>1</sup>H spectrum there were three readily recognizable singlets at δ 3.28, 2.26 and 2.10 integrating respectively to three, six and three protons. These were assigned by inspection to the methyl groups at 8", 7"/8' and 10' respectively. Their corresponding carbon chemical shifts were found from the gHMQC spectrum. The only triplet in the upfield region, δ 0.83, was assigned to CH<sub>3</sub>-15. C-15 was assigned from the gHMQC spectrum. In the gHMBC spectrum, H<sub>3</sub>-15 coupled to δ 24.24 (a negative signal in DEPT-135 spectrum) and δ 81.35. These were consistent with C-14 and C-13, respectively. H<sub>3</sub>-15 showed, in the DQF-COSY spectrum, correlation with H<sub>2</sub>-14 at δ 1.66 and 2.04. Now the TOCSY spectrum was used to assign δ 5.17, a double doublet signal in 1D-<sup>1</sup>H spectrum, to H-13. The spin group H-13 to H-14<sub>s</sub>, H-14<sub>r</sub> and H<sub>3</sub>-15 was very clear in the TOCSY spectrum. In the gHMBC spectrum H-13 demonstrated correlation with C-12 at δ 82.52 and also it was used to assign δ 1.29 to H<sub>3</sub>-21, a singlet in the 1D-<sup>1</sup>H spectrum, based on its correlation with C-12 and C-13. C-21 appeared at δ 25.19 in the gHMQC spectrum.

There were two remaining isolated singlets in the 1D-<sup>1</sup>H spectrum at δ 1.21 and 1.42. These were respectively assigned to H<sub>3</sub>-7" and H<sub>3</sub>-18. Their corresponding carbon chemical shifts were found through the gHMQC spectrum. C-18, in the gHMBC spectrum, showed connections with δ 3.43, 2.48 and 1.46. These were (non-specifically) H<sub>2</sub>-7 and H-5, but were distinguished by the strong mutual coupling between δ 1.46 and 2.48 in the DQF-COSY spectrum. Now the gHMQC spectrum was used to assign C-7 and C-5. Both protons attached to C-7 coupled to H-8 at δ 2.28. C-8 was found from the gHMQC spectrum; in the gHMBC spectrum C-8, in addition to coupling to H<sub>2</sub>-7, coupled to δ 1.07 which is consistent with H<sub>3</sub>-19.

A new starting point was chosen from the DEPT-135 spectrum. There were two remaining methylene groups at δ 30.64 and 34.56 were assigned non-specifically to C-2" and C-4'. In the gHMQC spectrum, δ 34.56 showed proton signals at δ 1.53 and 2.28 (overlapping H-8). In the TOCSY spectrum these two proton signals coupled to δ 5.13, a doublet in 1D-<sup>1</sup>H spectrum. This spin group was comfortably consistent with H-2"<sub>s</sub>, H-2"<sub>r</sub> and H-1". Hence the remaining methylene group at δ 30.56 was assigned to CH<sub>2</sub>-4'. Now the gHMQC spectrum was used to assign C-1" and H-4'. In the TOCSY spectrum, the H-4' at δ 1.75 coupled to δ 1.24, 1.33, 2.71, 3.49, 4.34 and 4.83. These interactions demonstrated a clear spin group existing in the desosamine sugar. The most downfield chemical shift was assigned to H-2' that showed correlation, in the DQF-COSY spectrum, with H-1' (at δ 4.34) and H-3' (at δ 2.71). The DQF-COSY spectrum was used to assign H-5' (at δ 3.49) from its correlation with H-4' and subsequently H-6' was determined from its coupling with H-5'. C-1', C-2' and C-3' were assigned using the gHMQC spectrum. C-5' and C-6' were assigned through their connections to H-4' (at δ 1.75) in the gHMBC spectrum.

In the 1D-<sup>1</sup>H spectrum, there were three overlapping methyl signals at δ 1.07 – 1.08. One of these had already been assigned to H<sub>3</sub>-19. The TOCSY and DQF-COSY spectra were now used to assign the spin group H-5/H-4/H<sub>3</sub>-17/H-3/H-2/H<sub>3</sub>-16. The remaining 2 methyl groups at δ 1.07 – 1.08 could now be assigned to H<sub>3</sub>-16 and H<sub>3</sub>-17. The carbon chemical shifts for C-2, C-3, C-4, C-16 and C-17 were found through their corresponding proton chemical shifts in the gHMQC spectrum.

The remaining spin group in the TOCSY spectrum ( $\delta$  3.98,  $\delta$  3.02, 1.87 and 1.21) was assigned to the cladinose sugar, H-5", H-4", OH-4" and H<sub>3</sub>-6" respectively. The OH-4" signal, a broad singlet, was missing in the DQF-COSY and gHMBC spectra. Now the gHMBC spectrum was used to assign C-4", C-5" and C-6". The chemical shift of C-3" was found through its connection to H-1" and H-2" in the gHMBC spectrum.

C-1 and C-9' were the most downfield signals in the 1D-<sup>13</sup>C spectrum. The assignment of C-1 to  $\delta$  178.57 was confirmed by the presence in the gHMBC spectrum of a crosspeak to a high frequency double doublet at  $\delta$  5.17, characteristic of H-13. The C-1 signal in the gHMBC spectrum was in fact folded back at about  $\delta$  35.8. This C-9' quaternary signal was assigned at  $\delta$  170.10 and showed couplings to H-2' and H<sub>3</sub>-10' in the gHMBC spectrum.

There was a quaternary signal in the 1D-<sup>13</sup>C spectrum that demonstrated couplings to  $\delta$  2.47 (H-7), 1.94 (H-4) and 1.42 (H<sub>3</sub>-18). This signal must be C-6. Therefore the remaining quaternary signal in the 1D-<sup>13</sup>C spectrum at  $\delta$  116.03 was assigned to C-9 showing connections to H<sub>3</sub>-19, H-8 and H-7 (at  $\delta$  1.46) in the gHMBC spectrum. In addition to these correlations, C-9 in the gHMBC spectrum also coupled to  $\delta$  2.97 and 1.31. The signal at  $\delta$  1.31 was an isolated doublet in the 1D-<sup>1</sup>H spectrum integrated to three protons. This was consistent with H<sub>3</sub>-20, the only remaining methyl group. The signal at  $\delta$  2.97, overlapping with H-2, was then assigned to H-10; this signal showed a correlation with H<sub>3</sub>-20 in the DQF-COSY spectrum. H-10 also coupled to  $\delta$  3.50, assigned to H-11. A signal that appeared only in the TOCSY spectrum at  $\delta$  2.02, overlapping with H-14 in the 1D-<sup>1</sup>H spectrum, coupled to H-10 and H-11, and was assigned to 11-OH. The completion of the assignments was carried out by assigning C-10 and C-11 through their appearance in the gHMBC spectrum. The full assignments are summarized in table 1.

**Table 2.** The full  $^1\text{H}$  and  $^{13}\text{C}$  NMR assignments of anhydroerythromycin A 2'-acetate in  $\text{CDCl}_3$ .

| Positin | Multiplicity | $^1\text{H}$ (ppm) | $J_{\text{HH}}$ (Hz) | $^{13}\text{C}$ (ppm) | HMBC Connectivities<br>( $^{13}\text{C} \rightarrow ^1\text{H}$ ) |
|---------|--------------|--------------------|----------------------|-----------------------|-------------------------------------------------------------------|
| 1       | –            | –                  | –                    | 178.57                | H(2), H(3), H <sub>3</sub> (16), H(13)                            |
| 2       | m            | 2.96 <sup>b</sup>  | –                    | 46.37                 | H <sub>3</sub> (16)                                               |
| 3       | dd           | 4.31               | 6.6, 3.9             | 76.34                 | H(4), H(5), H <sub>3</sub> (16), H(1'')                           |
| 4       | dq           | 1.94               | 13.2, 6.7            | 44.08                 | H(3), H(5), H <sub>3</sub> (17)                                   |
| 5       | d            | 3.43               | 5.5                  | 85.58                 | H(4), H(7), H <sub>3</sub> (17), H <sub>3</sub> (18), H(1')       |
| 6       | –            | –                  | –                    | 81.29                 | H(4), H(7), H <sub>3</sub> (18)                                   |
| 7       | dd           | 1.46               | 12.6, 6.6            | 41.26                 | H <sub>3</sub> (18)                                               |
|         | brt          | 2.48               | 13.6                 |                       |                                                                   |
| 8       | obscured     | 2.28               | –                    | 41.28                 | H <sub>3</sub> (19), H <sub>2</sub> (7)                           |
| 9       | –            | –                  | –                    | 116.03                | H(7), H(8), H(10), H <sub>3</sub> (19), H <sub>3</sub> (20)       |
| 10      | m            | 2.97 <sup>b</sup>  | –                    | 51.58                 | H <sub>3</sub> (20)                                               |
| 11      | obscured     | 3.50               | –                    | 87.23                 | H(10), H <sub>3</sub> (20), H <sub>3</sub> (21)                   |
| 11-OH   | obscured     | 2.04               | -                    | -                     | -                                                                 |
| 12      | –            | –                  | –                    | 82.58                 | H(13), H <sub>3</sub> (21)                                        |
| 13      | dd           | 5.17               | 11.7, 2.9            | 81.36                 | H(14), H <sub>3</sub> (15), H <sub>3</sub> (21)                   |
| 14      | dddd         | 1.66               | 14.1, 7.3, 2.9       | 24.24                 | H <sub>3</sub> (15), H(13)                                        |
|         | m            | 2.04               | –                    |                       |                                                                   |
| 15      | t            | 0.83               | 7.4                  | 10.95                 | H <sub>2</sub> (14)                                               |
| 16      | d            | 1.07               | 6.6                  | 14.75                 | H(2)                                                              |
| 17      | d            | 1.08               | 7.0                  | 15.97                 | H(4), H(5)                                                        |
| 18      | s            | 1.42               | –                    | 28.56                 | H(5), H <sub>2</sub> (7)                                          |
| 19      | d            | 1.07               | 6.6                  | 12.24                 | H(7), H(8)                                                        |
| 20      | d            | 1.31               | 7.3                  | 14.03                 | H(10), H(11)                                                      |
| 21      | s            | 1.29               | –                    | 25.19                 | –                                                                 |
| 1'      | d            | 4.34               | 7.7                  | 100.80                | H(5), H(2')                                                       |
| 2'      | dd           | 4.83               | 10.6, 7.6            | 71.14                 | H(3'), H(4')                                                      |
|         |              |                    | 23.7, 12.4,          |                       |                                                                   |
| 3'      | ddd          | 2.71               | 4.3                  | 63.46                 | H(2') H <sub>2</sub> (4'), H <sub>3</sub> (7'/8')                 |
| 4'      | obscured     | 1.33               | –                    | 30.64                 | H <sub>3</sub> (6')                                               |
|         | brdd         | 1.75               | 13.2, 2.6            |                       |                                                                   |
| 5'      | m            | 3.49 <sup>a</sup>  | –                    | 69.02                 | H(4'), H <sub>3</sub> (6')                                        |
| 6'      | d            | 1.24               | 6.0                  | 21.04                 | H(4')                                                             |
| 7'/8'   | s            | 2.26               | –                    | 40.65                 | H(3'), H <sub>3</sub> (7'/8')                                     |
| 9'      | –            | –                  | –                    | 170.10                | H(2'), H <sub>3</sub> (10')                                       |
| 10'     | s            | 2.10               | –                    | 21.64                 | H(4')                                                             |
| 1''     | d            | 5.13               | 4.4                  | 95.42                 | H(3), H <sub>2</sub> (2'')                                        |
| 2''     | dd           | 1.53               | 15.2, 4.9            | 34.56                 | H <sub>3</sub> (7'')                                              |
|         | obscured     | 2.28               | –                    |                       |                                                                   |
| 3''     | –            | –                  | –                    | 72.83                 | H(1''), H(2''), H <sub>3</sub> (7''), H <sub>3</sub> (8'')        |
| 4''     | d            | 3.02               | 9.9                  | 78.23                 | H(2''), H(5''), H <sub>3</sub> (6'')                              |
| 4''-OH  | brs          | 1.87               | -                    | -                     | -                                                                 |
| 5''     | dq           | 3.98               | 9.3, 6.2             | 65.15                 | H(1''), H(4''), H <sub>3</sub> (6'')                              |
| 6''     | d            | 1.21 <sup>a</sup>  | 7.7                  | 17.75                 | H(4'')                                                            |
| 7''     | s            | 1.21               | –                    | 21.63                 | H <sub>3</sub> (17), H(2'')                                       |
| 8''     | s            | 3.28               | –                    | 49.33                 | –                                                                 |

a: partially obscured

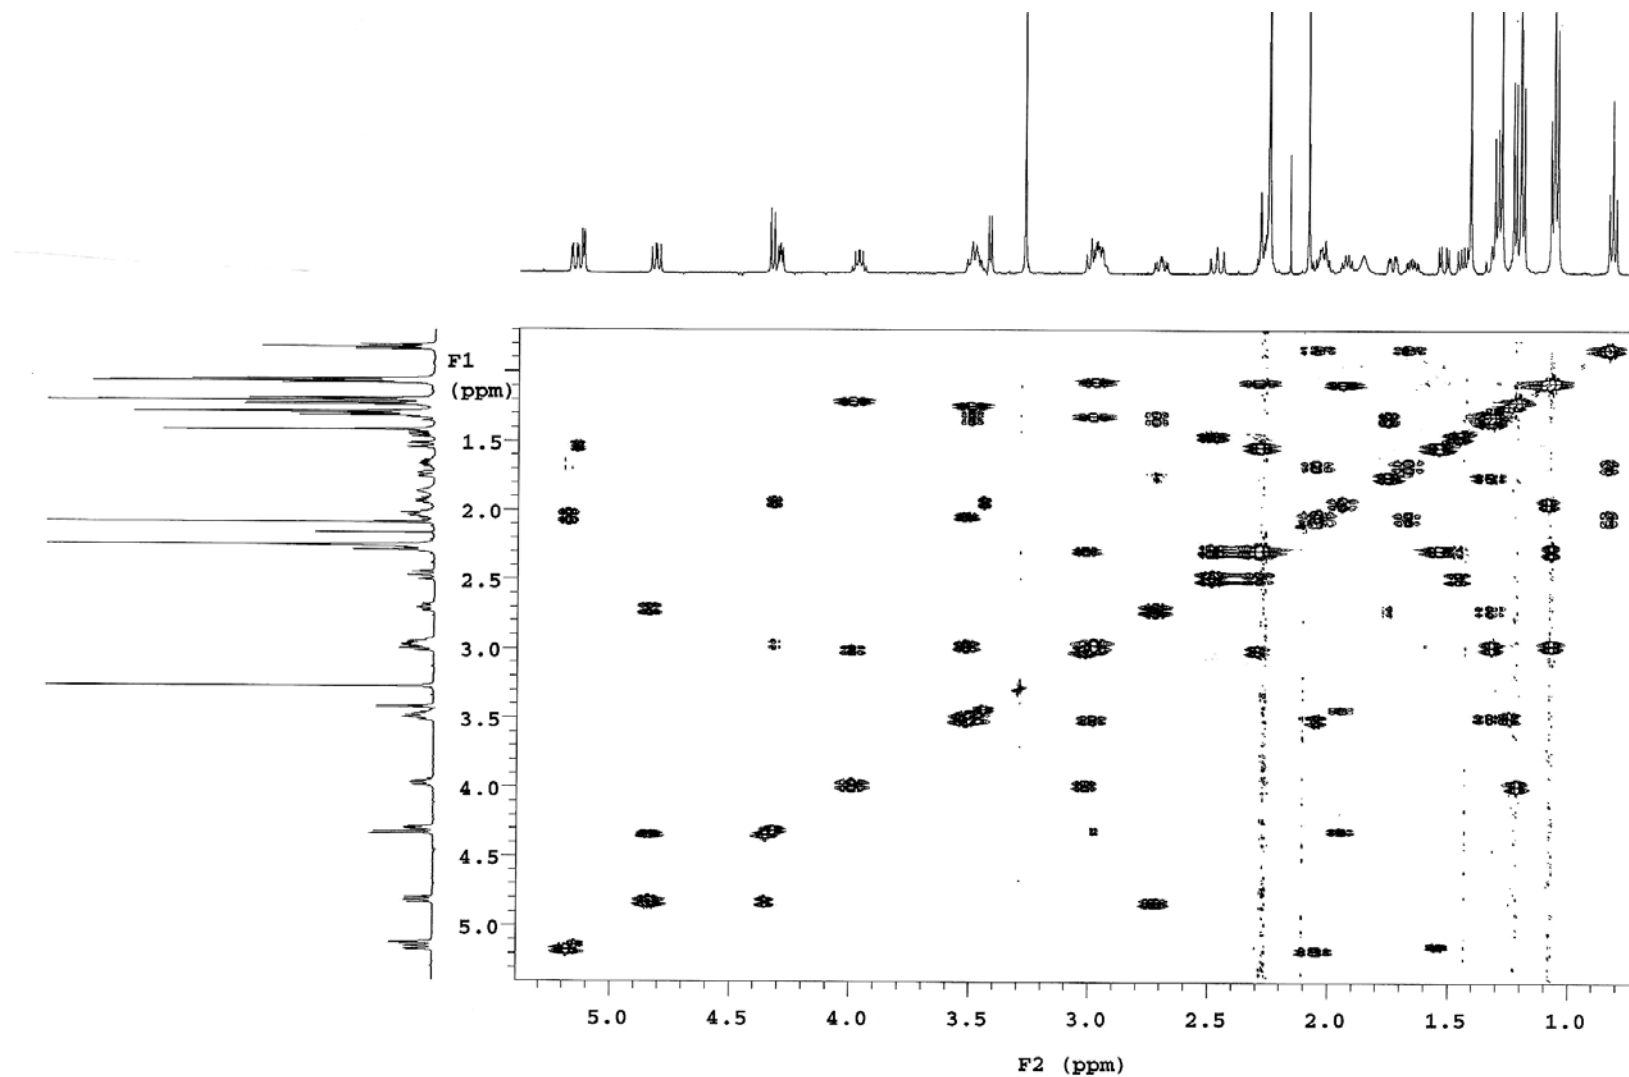

**Figure 2.** A contour plot of the 500 MHz DQF-COSY spectrum of anhydroerythromycin A 2'-acetate (**4**) in  $\text{CDCl}_3$ .

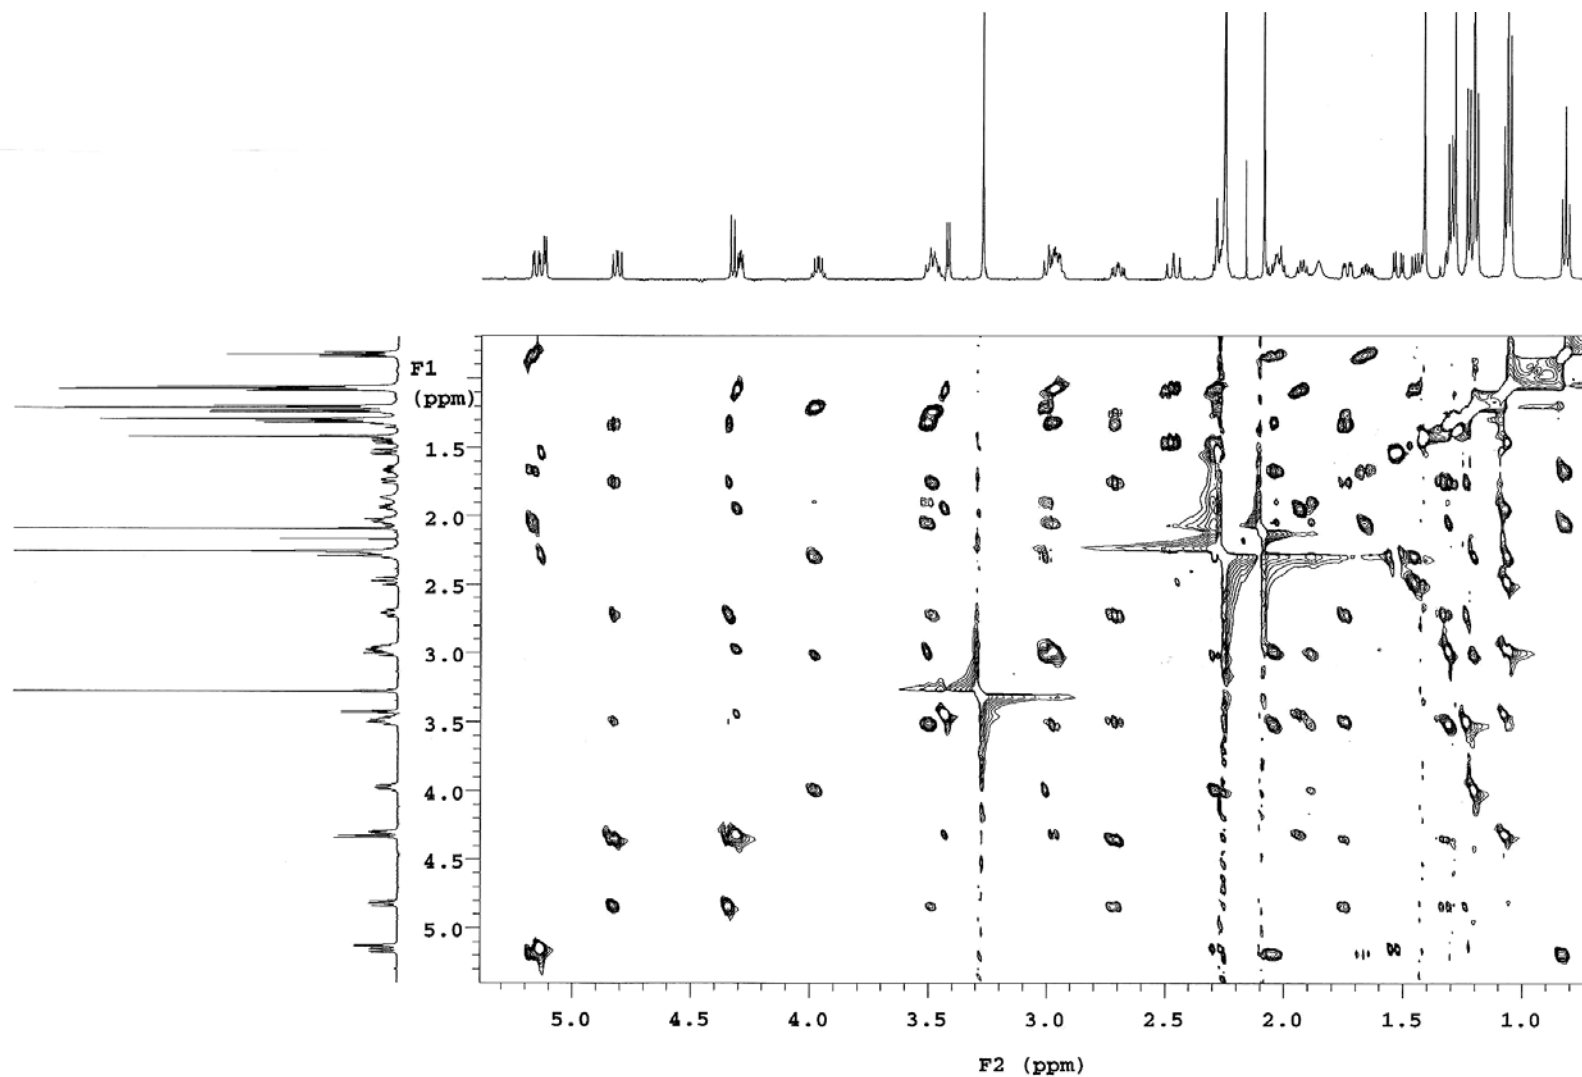

**Figure 3.** A contour plot of the 500 MHz TOCSY spectrum of anhydroerythromycin A 2'-acetate (**4**) in CDCl<sub>3</sub>.

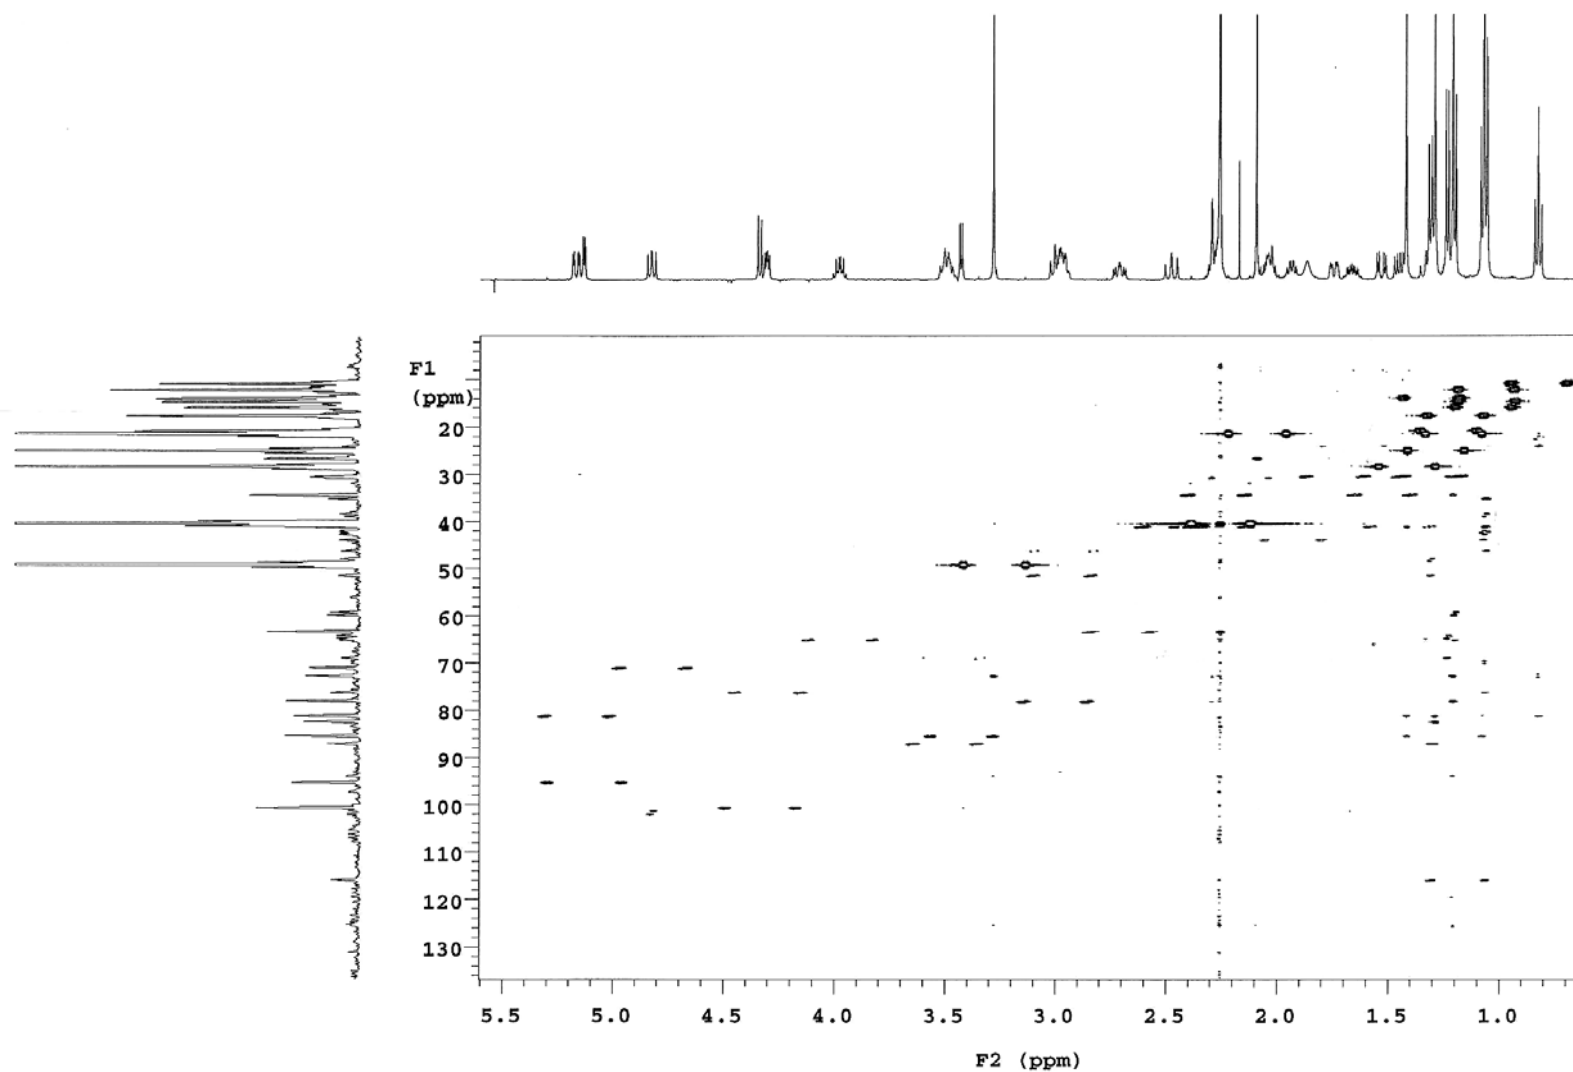

**Figure 4.** A contour plot of the 500 MHz gHMQC spectrum of anhydroerythromycin A 2'-acetate (**4**) in CDCl<sub>3</sub>.



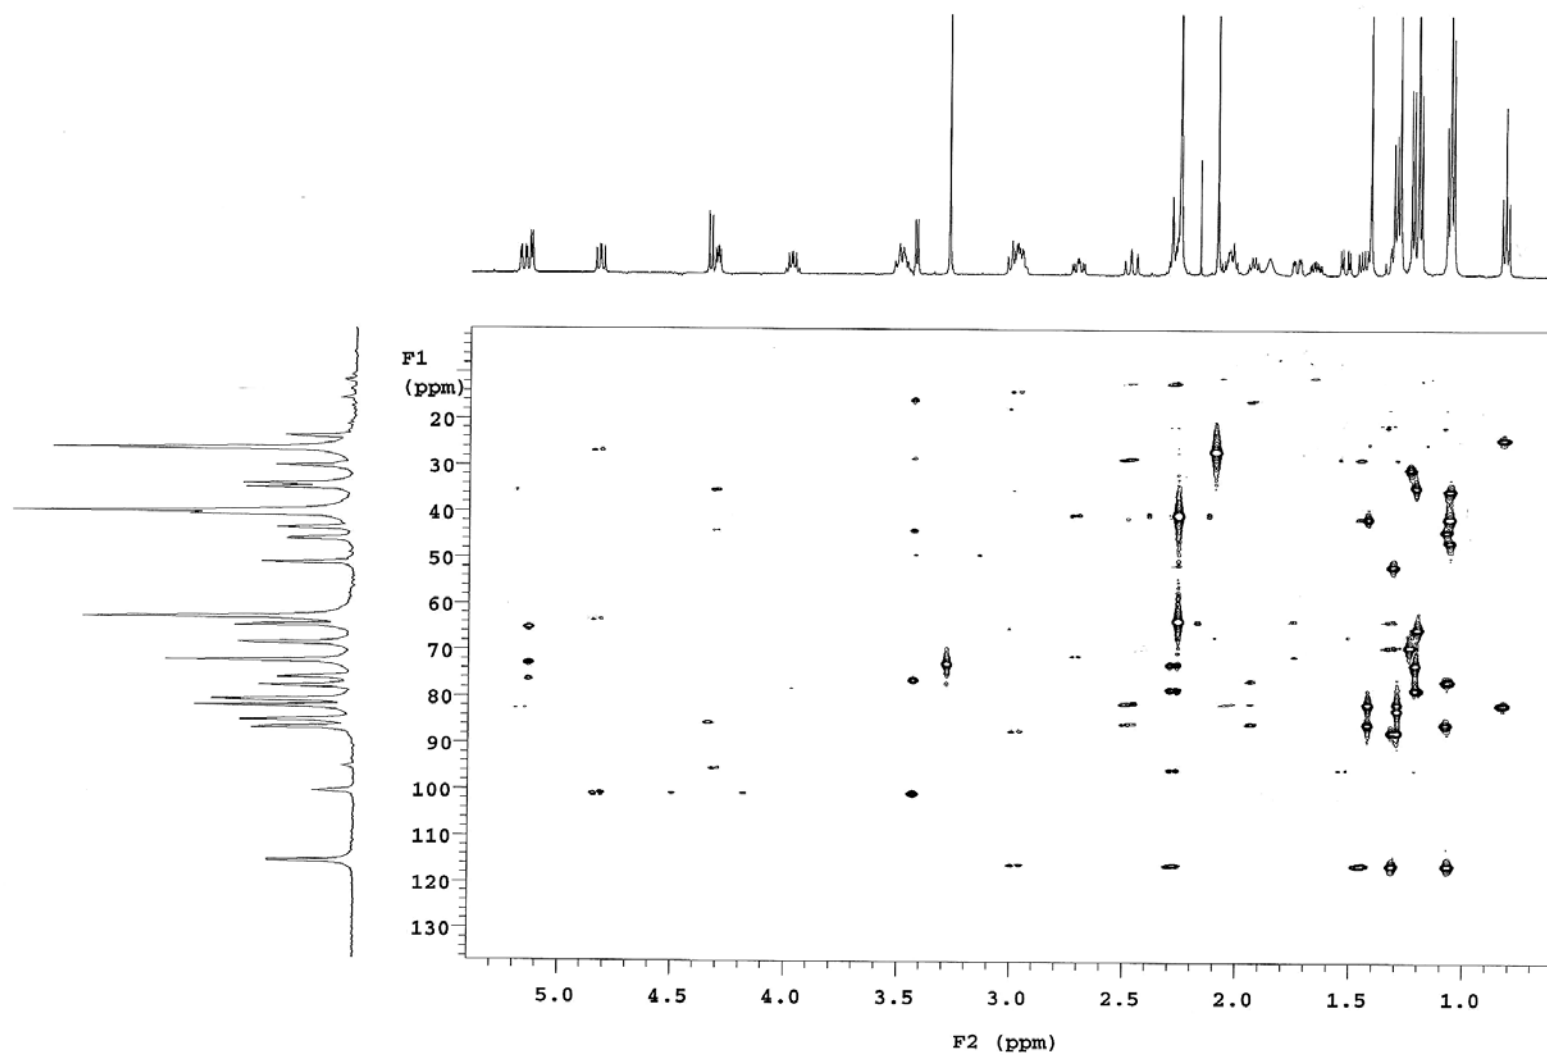

**Figure 5.** A contour plot of the 500 MHz GHMBC spectrum of anhydroerythromycin A 2'-acetate (**4**) in CDCl<sub>3</sub>.
